# Supplementary material for: Rapid Selective Detection and Quantification of β-Blockers Used in Doping Based on Molecularly Imprinted Nanoparticles (NanoMIPs)
Source: MDPI journal article supplement (doi:10.3390/polym14245420), 2022-12-11
Supplement: s1 [file s1]

## Supplementary Information

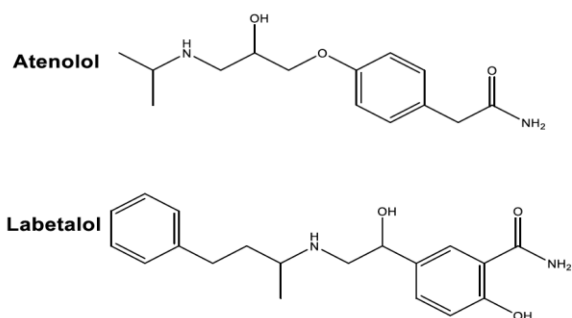

**S1.** Chemical structures of atenolol and labetalol. At the top is atenolol with molecular formula  $C_{14}H_{22}N_2O_3$ , in the lower part is labetalol with molecular formula  $C_{19}H_{24}N_2O_3$ .

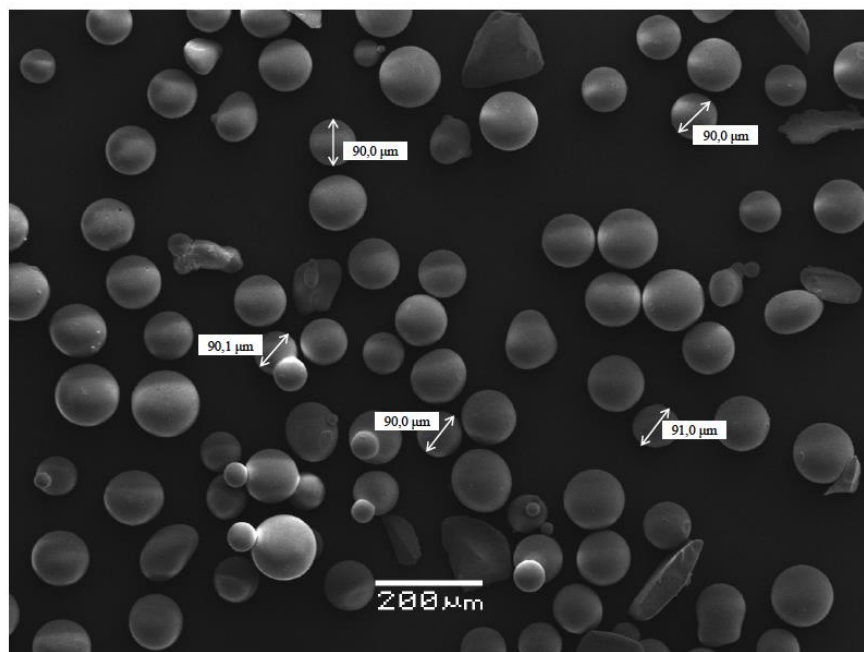

**S2.** SEM of the GBs used for the solid-phase synthesis of nanoMIPs.

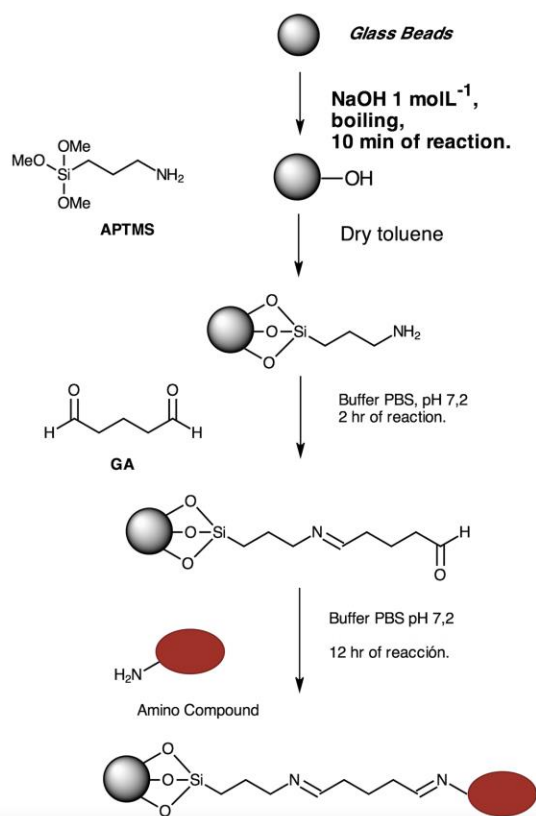

**S3.** Surface activation of glass beads and immobilization process of the target molecules (atenolol and labetalol) through a imine coupling chemistry.

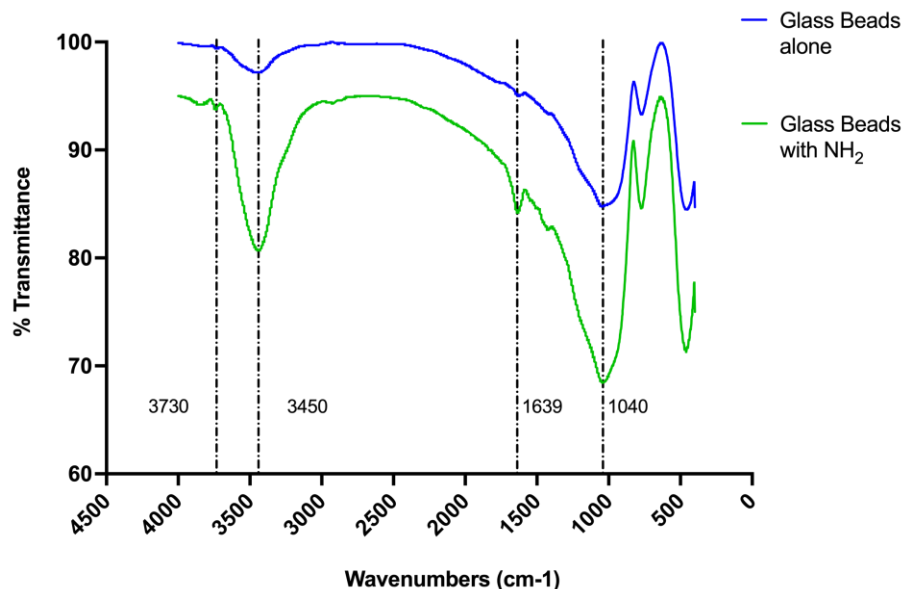

**S4.** FT-IR spectra of unmodified GBs and amine-functionalized GBs. Spectrum marked in blue indicates standard GBs (GBs-bare) and green color corresponds to the spectrum of GBs after reaction with APTMS (GBs-NH<sub>2</sub>).

The figure presents the FT-IR spectrum of standard GBs (SiO<sub>2</sub>), marked in blue color (GBs-bare), and the spectrum of GBs modified with APTMS (SiO<sub>2</sub>-APTMS), marked in green color (GBs-NH<sub>2</sub>). They were used to identify certain specific functional groups in a molecular structures. The absorption bands represent areas of the spectrum where occur certain bond vibrations. According to scientific data, the absorption band in the region around 1040 cm<sup>-1</sup> corresponds to the vibration of (SiO)<sub>n</sub> groups, the vibration band at 3440 cm<sup>-1</sup> is attributed to the presence of hydroxyl groups (-OH) and at and 1633 cm<sup>-1</sup> surface silanol groups with hydrogen bond and the remaining adsorbed water molecules. The band at 973 cm<sup>-1</sup> is assigned to Si-OH stretching. The bands at 787 cm<sup>-1</sup> and 467 cm<sup>-1</sup> are assigned to Si-O-Si stretching and Si-O-Si bending. New bands can be found after the modification with the coupling agent APTMS. The presence of NH<sub>2</sub> groups is reflected by the vibration band at 1421 cm<sup>-1</sup>, 1421 cm<sup>-1</sup> and 3770 cm<sup>-1</sup>. The results show that APTMS has been successfully immobilized and the surface of GBs contained primary amine groups.

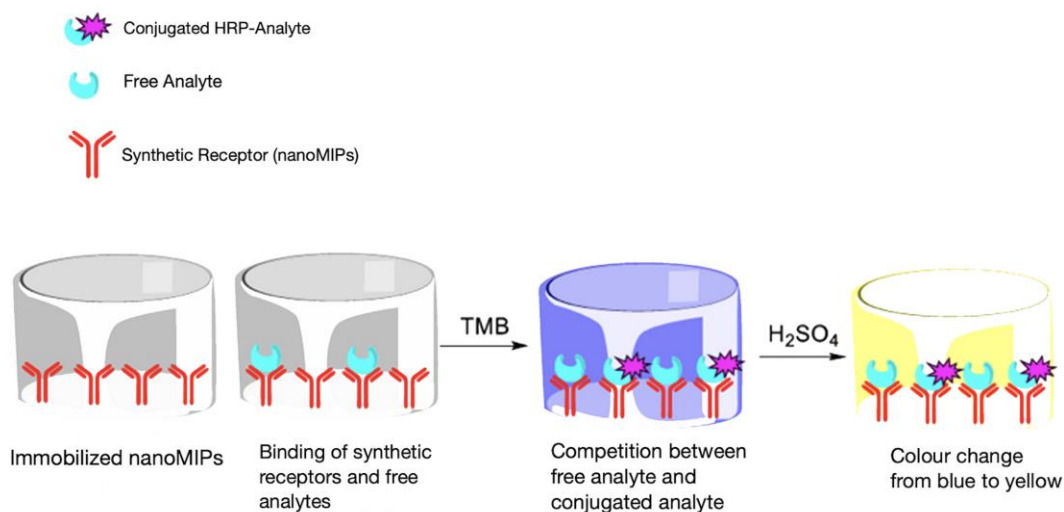

**S5.** Schematic illustration of a competitive pseudo-ELISA including nanoMIPs immobilized on the microplate surface. The figure presents binding competition between free analyte and analyte conjugated with HRP.

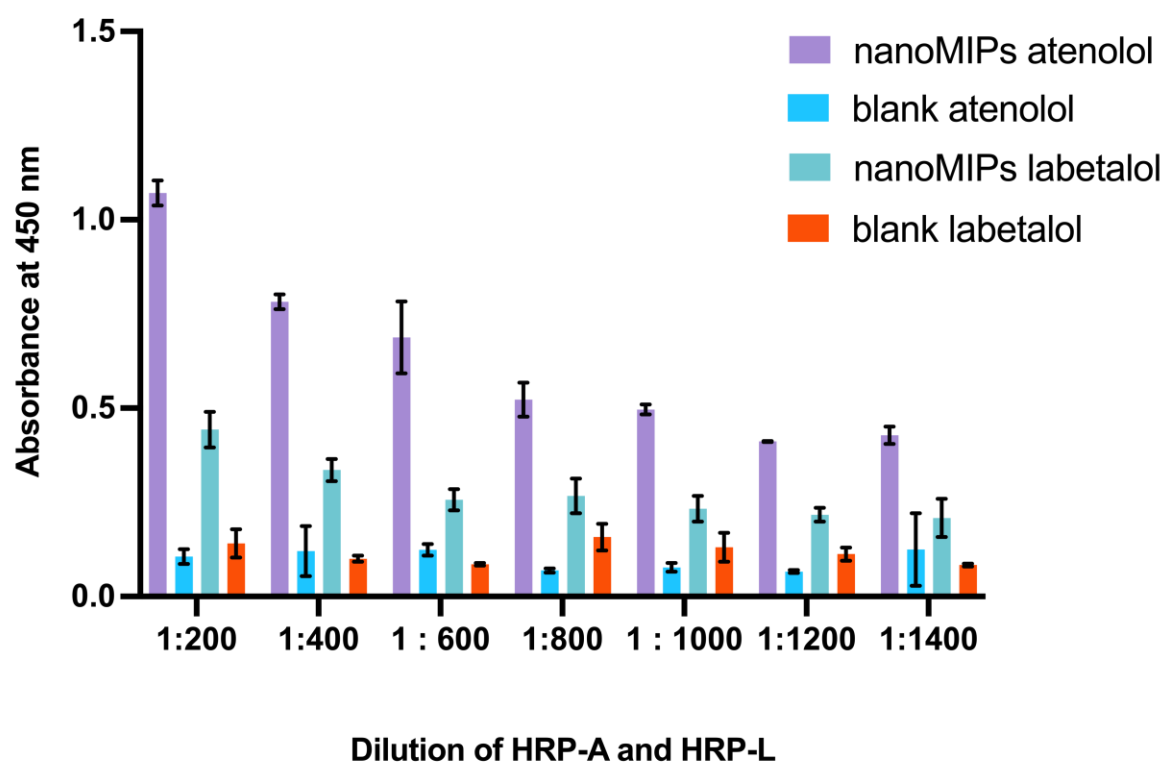

**S6.** The results obtained for different dilutions of the HRP-A, HRP-L conjugates and controls. Blue bars represent absorbance corresponding to the binding of the conjugate and nanoMIPs-A, green to the binding of the conjugate and nanoMIPs-L, red and purple are controls, without coated nanoMIPs.

| Dilution HRP-Atenolol | Ratio | Dilution HRP-Labetalol | Ratio |
|-----------------------|-------|------------------------|-------|
| 1:200                 | 10.10 | 1:200                  | 3.14  |
| 1:400                 | 6.49  | 1:400                  | 3.34  |
| 1:600                 | 5.55  | 1:600                  | 3.00  |
| 1:800                 | 7.57  | 1:800                  | 1.69  |
| 1:1000                | 6.42  | 1:1000                 | 1.78  |
| 1:1200                | 6.20  | 1:1200                 | 1.93  |
| 1:1400                | 3.42  | 1:1400                 | 0.25  |

**S7.** HRP-A conjugate and HRP-L conjugate dilutions in milli-Q water. Calculated ratios of the signal from wells with nanoMIPs to the controls (without coated nanoparticles) are presented on the right .

Ordinary one-way ANOVA multiple comparisons of Data 8 (A)

| Number of families                            | 1          |                    |              |             |                  |     |        |    |
|-----------------------------------------------|------------|--------------------|--------------|-------------|------------------|-----|--------|----|
| Number of comparisons per family              | 3          |                    |              |             |                  |     |        |    |
| Alpha                                         | 0,05       |                    |              |             |                  |     |        |    |
|                                               |            |                    |              |             |                  |     |        |    |
| Tukey's multiple comparisons test             | Mean Diff. | 95.00% CI of diff. | Significant? | Summary     | Adjusted P Value |     |        |    |
| atenolol solution vs. octopamine solution     | 0,7442     | 0.3266 to 1.162    | Yes          | ***         | 0,0008           | A-B |        |    |
| atenolol solution vs. pseudofedrin solution   | 0,7214     | 0.3038 to 1.139    | Yes          | **          | 0,0010           | A-C |        |    |
| octopamine solution vs. pseudofedrin solution | -0,02282   | -0.5050 to 0.4594  | No           | ns          | 0,9919           | B-C |        |    |
|                                               |            |                    |              |             |                  |     |        |    |
| Test details                                  | Mean 1     | Mean 2             | Mean Diff.   | SE of diff. | n1               | n2  | q      | DF |
| atenolol solution vs. octopamine solution     | 1,059      | 0,3148             | 0,7442       | 0,1628      | 10               | 5   | 6,466  | 17 |
| atenolol solution vs. pseudofedrin solution   | 1,059      | 0,3376             | 0,7214       | 0,1628      | 10               | 5   | 6,267  | 17 |
| octopamine solution vs. pseudofedrin solution | 0,3148     | 0,3376             | -0,02282     | 0,1880      | 5                | 5   | 0,1717 | 17 |

**S8 A).** Analysis of variance ANOVA for data 8 (A)

Ordinary one-way ANOVA multiple comparisons of Data 8 (B)

| Number of families                            | 1          |                    |              |             |                  |     |        |    |
|-----------------------------------------------|------------|--------------------|--------------|-------------|------------------|-----|--------|----|
| Number of comparisons per family              | 3          |                    |              |             |                  |     |        |    |
| Alpha                                         | 0,05       |                    |              |             |                  |     |        |    |
| Tukey's multiple comparisons test             | Mean Diff. | 95.00% CI of diff. | Significant? | Summary     | Adjusted P Value |     |        |    |
| atenolol solution vs. octopamine solution     | -0,04866   | -0.1517 to 0.05442 | No           | ns          | 0,4432           | A-B |        |    |
| atenolol solution vs. pseudofedrin solution   | -0,07148   | -0.1746 to 0.03160 | No           | ns          | 0,1956           | A-C |        |    |
| octopamine solution vs. pseudofedrin solution | -0,02282   | -0.1259 to 0.08026 | No           | ns          | 0,8277           | B-C |        |    |
| Test details                                  | Mean 1     | Mean 2             | Mean Diff.   | SE of diff. | n1               | n2  | q      | DF |
| atenolol solution vs. octopamine solution     | 0,2661     | 0,3148             | -0,04866     | 0,03864     | 5                | 5   | 1,781  | 12 |
| atenolol solution vs. pseudofedrin solution   | 0,2661     | 0,3376             | -0,07148     | 0,03864     | 5                | 5   | 2,616  | 12 |
| octopamine solution vs. pseudofedrin solution | 0,3148     | 0,3376             | -0,02282     | 0,03864     | 5                | 5   | 0,8352 | 12 |

S8 B). Analysis of variance ANOVA for data 8 (B)

Ordinary one-way ANOVA multiple comparisons of Data 8 (C)

| Number of families                            | 1          |                    |              |             |                  |     |       |    |
|-----------------------------------------------|------------|--------------------|--------------|-------------|------------------|-----|-------|----|
| Number of comparisons per family              | 3          |                    |              |             |                  |     |       |    |
| Alpha                                         | 0,05       |                    |              |             |                  |     |       |    |
| Tukey's multiple comparisons test             | Mean Diff. | 95.00% CI of diff. | Significant? | Summary     | Adjusted P Value |     |       |    |
| labetalol solution vs. octopamine solution    | 0,1686     | 0.05583 to 0.2813  | Yes          | **          | 0,0061           | A-B |       |    |
| labetalol solution vs. pseudofedrin solution  | 0,1369     | 0.02411 to 0.2496  | Yes          | *           | 0,0198           | A-C |       |    |
| octopamine solution vs. pseudofedrin solution | -0,03173   | -0.1445 to 0.08102 | No           | ns          | 0,7207           | B-C |       |    |
| Test details                                  | Mean 1     | Mean 2             | Mean Diff.   | SE of diff. | n1               | n2  | q     | DF |
| labetalol solution vs. octopamine solution    | 0,4057     | 0,2371             | 0,1686       | 0,04038     | 4                | 4   | 5,904 | 9  |
| labetalol solution vs. pseudofedrin solution  | 0,4057     | 0,2689             | 0,1369       | 0,04038     | 4                | 4   | 4,793 | 9  |
| octopamine solution vs. pseudofedrin solution | 0,2371     | 0,2689             | -0,03173     | 0,04038     | 4                | 4   | 1,111 | 9  |

S8 C). Analysis of variance ANOVA for data 8 (C)

Ordinary one-way ANOVA multiple comparisons of Data 8 (D)

| Number of families                            | 1          |                     |              |             |                  |     |        |    |
|-----------------------------------------------|------------|---------------------|--------------|-------------|------------------|-----|--------|----|
| Number of comparisons per family              | 3          |                     |              |             |                  |     |        |    |
| Alpha                                         | 0,05       |                     |              |             |                  |     |        |    |
|                                               |            |                     |              |             |                  |     |        |    |
| Tukey's multiple comparisons test             | Mean Diff. | 95.00% CI of diff.  | Significant? | Summary     | Adjusted P Value |     |        |    |
| labetalol solution vs. octopamine solution    | 0,01075    | -0.03649 to 0.05799 | No           | ns          | 0,8049           | A-B |        |    |
| labetalol solution vs. pseudofedrin solution  | 0,01525    | -0.03199 to 0.06249 | No           | ns          | 0,6530           | A-C |        |    |
| octopamine solution vs. pseudofedrin solution | 0,004500   | -0.04274 to 0.05174 | No           | ns          | 0,9619           | B-C |        |    |
|                                               |            |                     |              |             |                  |     |        |    |
| Test details                                  | Mean 1     | Mean 2              | Mean Diff.   | SE of diff. | n1               | n2  | q      | DF |
| labetalol solution vs. octopamine solution    | 0,2329     | 0,2221              | 0,01075      | 0,01692     | 4                | 4   | 0,8985 | 9  |
| labetalol solution vs. pseudofedrin solution  | 0,2329     | 0,2176              | 0,01525      | 0,01692     | 4                | 4   | 1,275  | 9  |
| octopamine solution vs. pseudofedrin solution | 0,2221     | 0,2176              | 0,004500     | 0,01692     | 4                | 4   | 0,3761 | 9  |

**S8 D).** Analysis of variance ANOVA for data 8 (D)
